# Supplementary material for: Significance of glioma-associated oncogene homolog 1 (GLI1)expression in claudin-low breast cancer and crosstalk with the nuclear factor kappa-light-chain-enhancer of activated B cells (NFκB) pathway
Source: Springer Nature journal article supplement (doi:10.1186/s13058-014-0444-4), 2014-09-24

## Figure Legends

**Table S1.** 150 agent screen.  $IC_{50}$   $\mu$ M values for HMLE-shEcad and HMLE-shGFP cell lines are listed. Values were calculated from curves derived using XL-Fit software using Michaelis-Menten kinetics. NF indicates not determined, either because no curve fit could be obtained, or because the calculated  $IC_{50}$  was outside the experimental concentrations tested. Generally indicates lack of dose-dependent response to the agent tested. Agents representing standard of care therapy for triple negative breast cancer have been highlighted in bright yellow. Drugs which fall into similar classes of agents as those used in standard of care have been highlighted in pale yellow.

**Figure S1.** EMT cells have reduced EGFR and are resistant to EGFR inhibitors. **(A)** 384-well format dose-response curves of HMLE-shEcad (blue) and HMLE-shGFP (green) cells to erlotinib **(A)** or gefitinib **(B)**. Curve fit determined via XL-Fit using Michaelis-Menten kinetics. Red lines indicate  $IC_{50}$  value for HMLE-shGFP cells. Error bars indicate coefficient of variance between triplicate treatments. **(C)** Dose response curves generated in 96-well plate format with CellTiter-Glo for HMLE-shEcad (blue), HMLE-shGFP (green), HMLE-Snail (brown), and HMLE-pBP (gray) cells treated with gefitinib. Curve fit determined via XL-Fit using Michaelis-Menten kinetics. **(D)** Immunoblot of phosphorylated EGFR (pEGFR) and total EGFR in HMLE-shEcad and HMLE-shGFP cells. **(E)** Immunoblot of pEGFR and total EGFR in HMLE-shEcad and HMLE-shGFP cells treated with 10 ng/mL EGF for the indicated periods of time. Cells were starved in media lacking FBS for 5 hours prior to treatment. **(F)** Immunoblot of ERBB2 in HMLE-shEcad and HMLE-shGFP cells.

**Figure S2.** *GLI2* and *GLI3* levels are not affected by JK184 treatment or by virus expressing shGli1. Plot of *GLI2* **(A)** and *GLI3* **(B)** RNA levels in HMLE cells incubated

with JK184 at the indicated concentrations for three days. Plot of *GLI2* (C) and *GLI3* (D) transcript levels in claudin-low cell lines treated with the indicated JK184 doses for three days. Plot of *GLI2* (E) and *GLI3* (F) transcript levels in claudin-low cell lines infected with retroviruses targeting the indicated transcripts.

**Figure S3.** Results of *GLI1* knockdown in control and basal cell lines. (A) Relative transcript levels of claudin-low (BT549, HBL100, HS578T, MDA.MB.157, MDA.MB.231 and MDA.MB.436), basal (HCC1806), and control (MCF10a, MTSV1-7) cell lines. (B) Western blot and (C) real-time data depicting efficacy of *GLI1* knockdown in HCC1806 and MTSV1-7 cell lines. (D) Colony formation, (E) migration, (F) proliferation, and (G) sphere forming ability of the indicated cell lines with either a non-targeting (NT) or sh*GLI1*-targeted (sh*GLI1* #1) retrovirus. Cells were selected with puromycin for three days prior to experimentation. (H) Plot of *GLI1* expression levels in adherent HCC1806 cells compared to cells grown as spheres.

**Figure S4.** Biological replicate of *in vivo* experiment. (A) Plot of tumor volume over time arising from orthotopic injection of MDA.MB.436 cells infected with either non-targeting (NT) or *GLI1* knockdown constructs. n = four animals.

**Figure S5.** Screen for upstream *GLI1* effectors. (A) Candidate agents were grouped into four pools, with 1  $\mu$ M of each drug used for treatment. DMSO is the vehicle control, and JK184 (1  $\mu$ M) a positive control for Gli1 suppression. Real-time RT-PCR analysis for *GLI1* mRNA was conducted after 16h treatment. (B) Agents from groups 3 and 4 were analyzed individually for their effects on *GLI1* transcript levels, as in A). (C) NF $\kappa$ B reporter assay showing effects of triptolide on  $\kappa$ B reporter assay (firefly) compared to

control (renilla) luciferase activity. The luciferase reporter (pBII-Luc) and pRL-TK renilla control plasmids were transfected into cells using X-tremeGENE 9 (Roche). 16h after transfection the medium was replaced with growth medium. The following day, cells were treated with 1  $\mu$ M triptolide or DMSO control for 6 hours. Cells were assayed using the Dual-Luciferase Reporter Assay Reporter System (Promega).

**Figure S6.** NF $\kappa$ B immunofluorescence in claudin-low cell lines. Immunofluorescence images taken at 200x magnification showing localization of NF $\kappa$ B p50 (left-most panels, I) or p65 (left-most panels, II) subunits in claudin-low or MCF10a cell lines. DAPI staining indicates nuclei. Scale bar indicates 100  $\mu$ m.

**Figure S7.** p65 ChIP from additional cell lines and additional knockdown experiments. **(A)** ChIP experiment conducted in HMLE-shGFP and HMLE-pBP cell lines. Binding to Site 1 in the *GLI1* promoter is depicted for pull-downs with control IgG or antibody directed against p65 or histone H3. **(B)** Graph depicting the relative fold enrichment of p65 binding to Site 1 compared to a control site (GAPDH). Error bars indicate standard error derived from two experiments. **(C)** Knockdown of *RELA* and *NF $\kappa$ B1* in MDA.MB.436 cells, and effect on transcript levels of *RELA*, *NF $\kappa$ B1*, and *GLI1*. Error bars are the standard error of the mean between three biological replicates.\*= p-value below 0.05, \*\* = p-value below 0.005. **(D)** Inducible knockdown of *RELA* in MDA.MB.436 cells, and effect on transcript levels of *RELA*, *NF $\kappa$ B1*, and *GLI1*. Error bars are the standard error of the mean between three biological replicates.\*= p-value below 0.05, \*\* = p-value below 0.005.

**Table S1.** 150 compound screen. IC50 ( $\mu$ M) values for HMLE-shEcad and HMLE-shGFP cell lines are listed.

| Compound             | shGFP | shEcad |
|----------------------|-------|--------|
| 10058-F4             | 2.82  | NF     |
| 17-AAG               | 0.06  | 0.11   |
| 17-DMAG              | 0.01  | 0.04   |
| 2-Deoxy-D-glucose    | NF    | NF     |
| 4'Z D4T              | NF    | NF     |
| 8-1-T                | NF    | NF     |
| ABT-737              | NF    | NF     |
| ABT-888              | NF    | NF     |
| AG490                | NF    | NF     |
| AG538                | NF    | NF     |
| Akt inhibitor III    | NF    | NF     |
| AR-A014418           | NF    | NF     |
| Arsenic trioxide     | NF    | NF     |
| Axitinib             | NF    | NF     |
| AZD 7762             | 0.09  | 0.03   |
| B8                   | NF    | NF     |
| Bay11-7085           | 2.38  | 2.64   |
| Bexarotene           | NF    | NF     |
| BEZ-235              | 0.01  | 0.09   |
| BIBR-1532            | NF    | NF     |
| Bithionol            | NF    | NF     |
| BMS-536924           | NF    | NF     |
| Bortezomib           | 0.01  | 0.01   |
| Bosutinib            | 0.37  | >10    |
| BQ 788               | NF    | NF     |
| Bromopyruvic acid    | NF    | NF     |
| Bryostatin 1         | NF    | NF     |
| BX 513 hydrochloride | 9.32  | 11.29  |
| Capecitabine         | NF    | NF     |
| Carboplatin          | NF    | NF     |
| Carmustine           | NF    | NF     |
| Celecoxib            | NF    | NF     |
| Cerulenin            | NF    | NF     |
| CID 755673           | NF    | NF     |
| CIP 13-74            | 1.16  | 1.42   |
| CIP-1359             | 0.75  | 4.13   |
| Cisplatin            | NF    | NF     |

|                               |      |       |
|-------------------------------|------|-------|
| Curcumin                      | 6.45 | 10.94 |
| CW3                           | NF   | NF    |
| Cyclopamine                   | NF   | NF    |
| Cytarabine HCl                | 0.29 | 1.44  |
| Dasatinib                     | 0.08 | 0.55  |
| Daunorubicin HCl              | 0.04 | 0.06  |
| Decitabine                    | NF   | NF    |
| Dehydroepiandrosterone (DHEA) | NF   | NF    |
| Dibenzazepine (DBZ)           | NF   | NF    |
| Disulfiram                    | NF   | NF    |
| Dovitinib                     | 0.54 | 5.61  |
| Doxorubicin                   | 0.03 | 0.09  |
| EGCG                          | NF   | NF    |
| Embelin                       | NF   | NF    |
| Enzastaurin                   | NF   | NF    |
| Eriocalyxin B                 | 0.34 | 0.19  |
| Erlotinib                     | 0.24 | >10   |
| Etoposide                     | 1.07 | 1.93  |
| Everolimus                    | NF   | NF    |
| FAK Inhibitor 14              | 0.80 | 0.85  |
| Flavopiridol                  | 0.13 | 0.31  |
| FTI 276                       | NF   | NF    |
| GDC 0449                      | NF   | NF    |
| GDC 0879                      | NF   | NF    |
| Gefitinib                     | 0.09 | NF    |
| GW 9662                       | NF   | NF    |
| GW5074                        | NF   | NF    |
| HA14-1                        | NF   | NF    |
| Hydroxychloroquine sulfate    | 5.41 | 14.95 |
| Imatinib                      | >10  | NF    |
| Imiquimod                     | NF   | NF    |
| Irinotecan HCl                | 3.61 | 7.04  |
| Ixabepilone                   | 0.00 | 0.00  |
| JK184                         | 0.01 | 0.00  |
| JNK inhibitor II              | NF   | NF    |
| Lapatinib                     | 0.34 | NF    |
| LFMAU                         | NF   | NF    |
| LOddC                         | 0.71 | 4.73  |
| Ly294002                      | NF   | NF    |
| Melphalan                     | NF   | NF    |
| Methotrexate                  | 0.02 | 0.01  |
| MIF-098                       | NF   | NF    |

|                   |             |             |
|-------------------|-------------|-------------|
| MIF-103           | NF          | NF          |
| MIF-108           | NF          | NF          |
| MIF-112           | NF          | NF          |
| MIF-139           | NF          | NF          |
| MIF-153           | NF          | NF          |
| MIF-154           | NF          | NF          |
| Mitomycin C       | 0.46        | 1.44        |
| MK-2206           | 4.42        | NF          |
| Nilotinib         | NF          | NF          |
| NSC 625987        | NF          | NF          |
| NSC 66811         | NF          | NF          |
| Nutlin-3          | NF          | NF          |
| NV128             | 0.28        | 0.23        |
| NV356             | 0.75        | 0.57        |
| NV360             | 0.72        | 0.45        |
| Obatoclax         | 0.26        | 0.26        |
| Onrigin           | NF          | NF          |
| OPC-32            | NF          | NF          |
| Oxaliplatin       | NF          | NF          |
| <b>Paclitaxel</b> | <b>0.00</b> | <b>0.01</b> |
| PD-0332991        | 7.30        | NF          |
| PD173074          | 2.74        | 4.00        |
| PD198306          | NF          | NF          |
| Pentostatin       | NF          | NF          |
| Perifosine        | 0.66        | 2.95        |
| PHA 665752        | NF          | NF          |
| PLX 4032          | NF          | NF          |
| PLX 4720          | NF          | NF          |
| PNU 74654         | NF          | NF          |
| PP2               | NF          | NF          |
| PQ401             | NF          | NF          |
| PRIMA-1           | NF          | NF          |
| PX 12             | 7.11        | 5.69        |
| Rapamycin         | NF          | NF          |
| Roscovitine       | NF          | NF          |
| S31-201           | NF          | NF          |
| S6                | NF          | NF          |
| Salermide         | NF          | NF          |
| SANT-2            | NF          | NF          |
| SB-203580         | NF          | NF          |
| SB-431542         | NF          | NF          |
| Simvastatin       | 7.58        | 7.34        |

|                        |      |      |
|------------------------|------|------|
| SL 0101-1              | NF   | NF   |
| Sodium Dichloroacetate | NF   | NF   |
| Sodium stibogluconate  | NF   | NF   |
| Sorafenib              | 6.49 | 9.50 |
| Stattic                | 0.96 | 0.96 |
| Staurosporine          | 0.00 | 0.00 |
| SU5402                 | NF   | NF   |
| Sunitinib              | 2.64 | 7.39 |
| Syk Inhibitor          | NF   | NF   |
| Tamoxifen citrate      | NF   | NF   |
| Temozolomide           | NF   | NF   |
| Temsirolimus           | NF   | NF   |
| Thalidomide            | NF   | NF   |
| Topotecan              | 0.05 | 0.13 |
| Tozasertib             | 1.21 | 4.31 |
| Tretinoin              | NF   | NF   |
| Triapine               | 0.68 | 0.93 |
| Trichostatin A         | 0.21 | 0.35 |
| Trilophorin            | NF   | NF   |
| Triptolide             | 0.00 | 0.00 |
| Troglitazone           | NF   | NF   |
| Tylophorin             | 0.38 | 0.39 |
| U0126                  | NF   | NF   |
| Vandetanib             | 5.01 | NF   |
| Vatalanib              | NF   | NF   |
| Vinblastine sulfate    | 0.01 | 0.01 |
| Vorinostat             | 1.68 | 1.50 |
| XAV 939                | NF   | NF   |
| Y-27637                | NF   | NF   |

**Figure S1: EMT cells have reduced EGFR and are resistant to EGFR inhibitors**

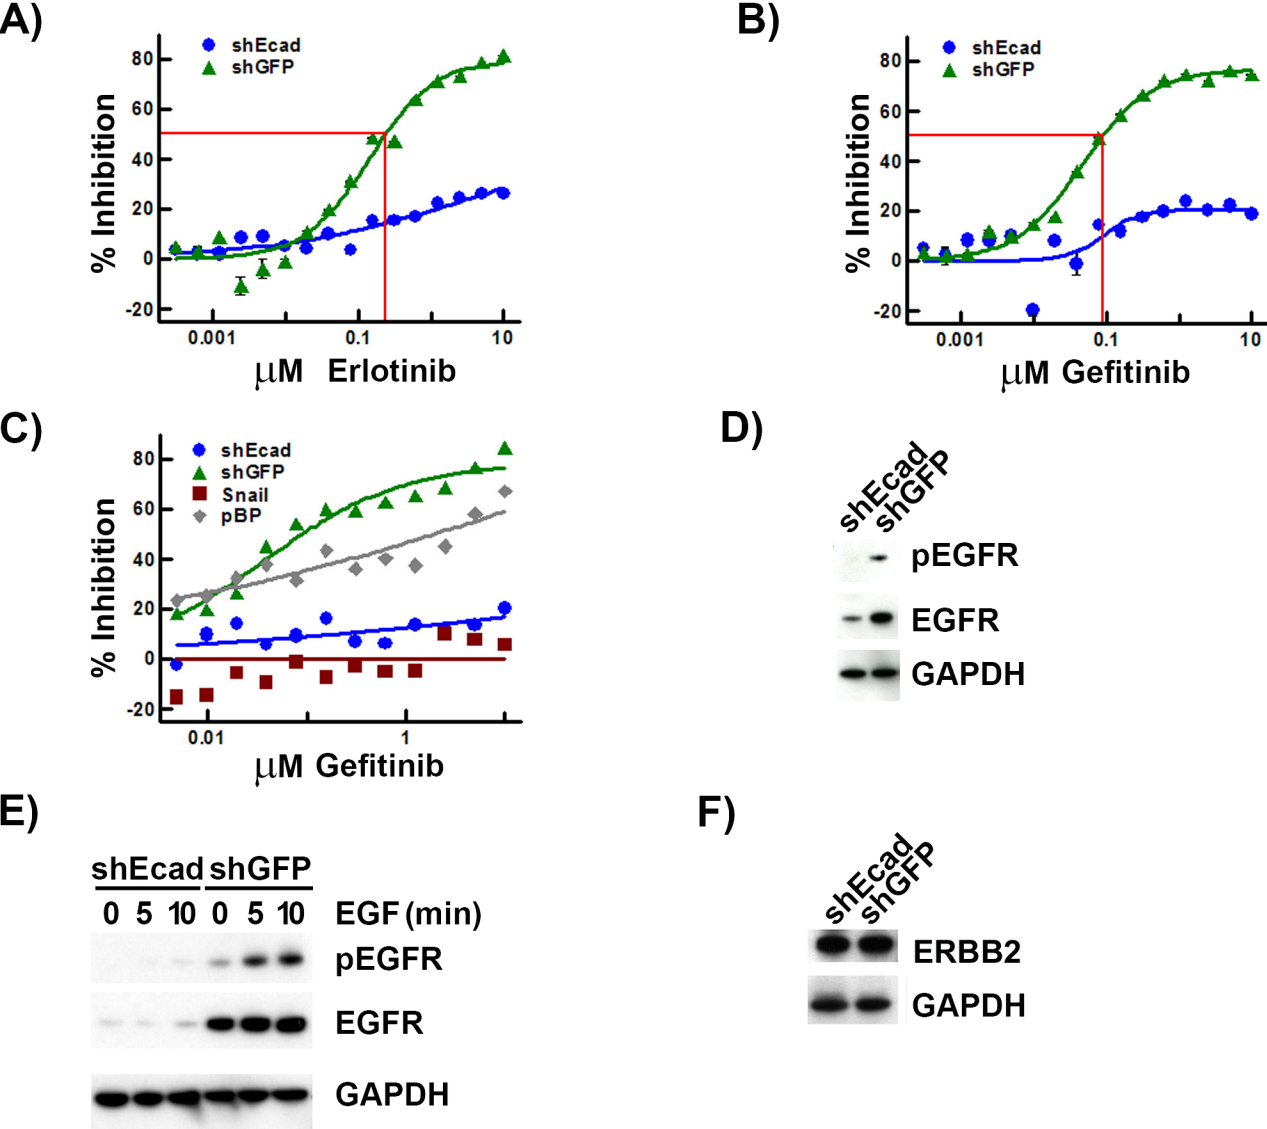



**Figure S2: *GLI2* and *GLI3* levels are not affected by JK184 treatment or by virus expressing sh*GLI1*.**

**A)**

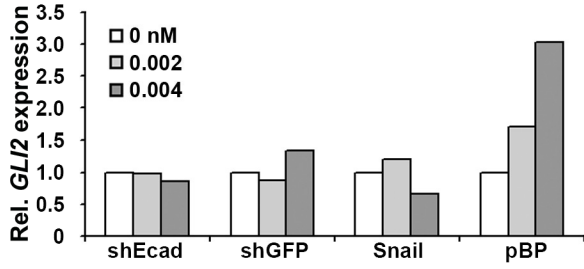

**B)**

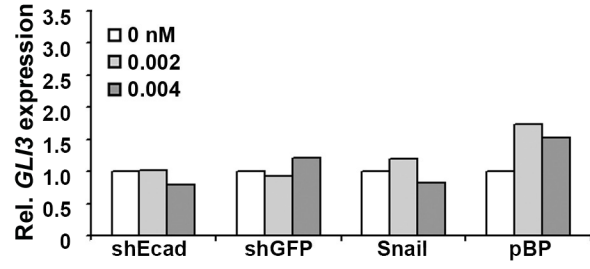

**C)**

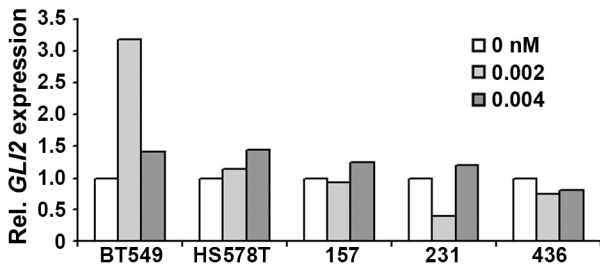

**D)**

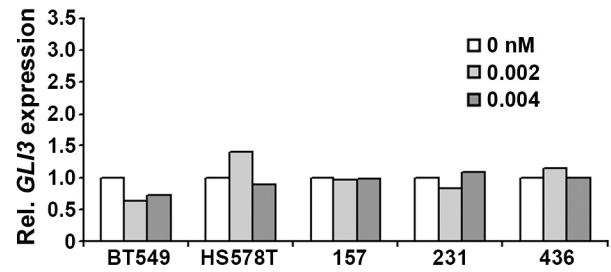

**E)**

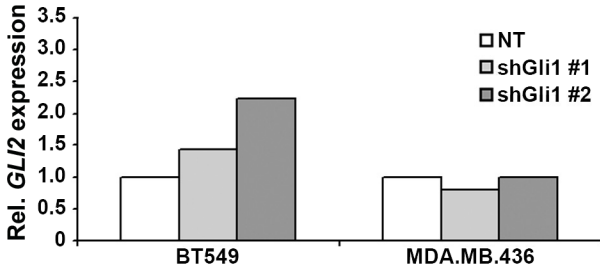

**F)**

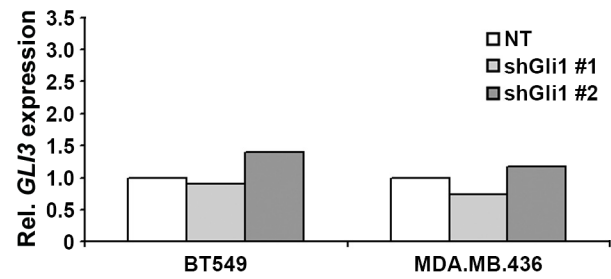

**Figure S3: Results of *GLI1* knockdown in control and basal cell lines.**

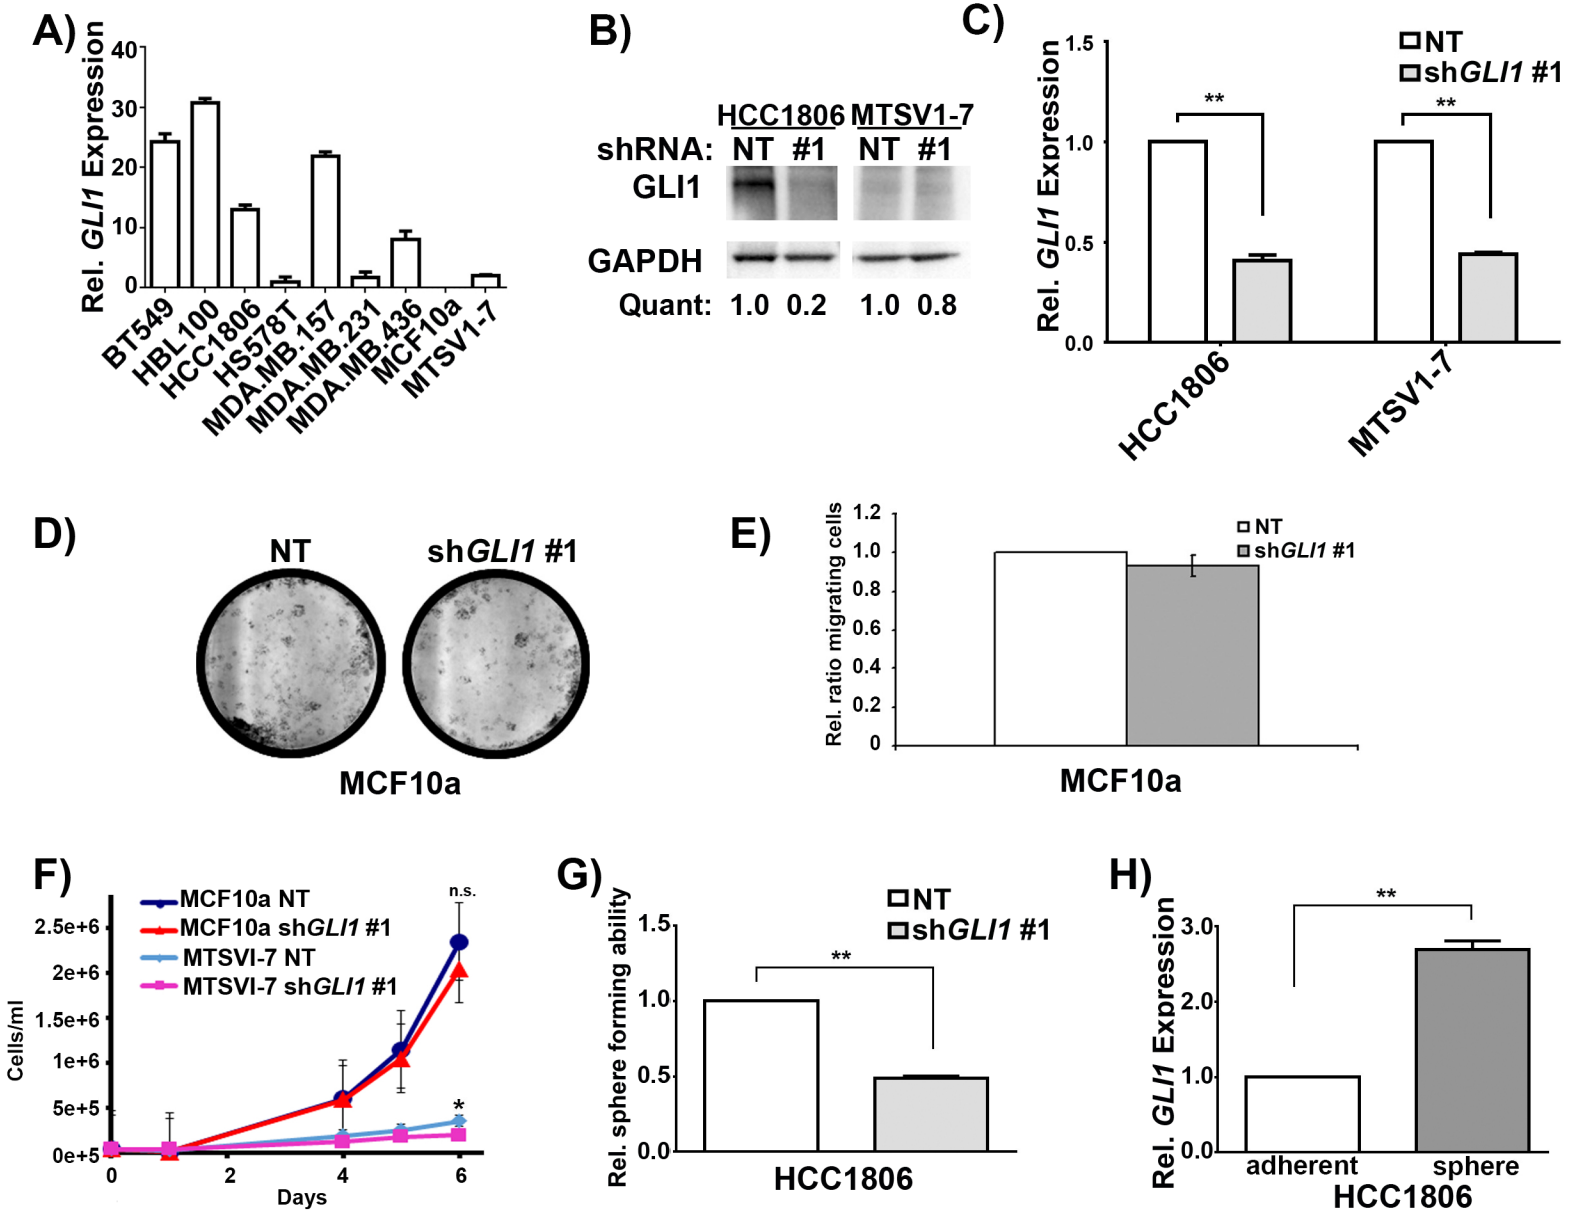

Figure S4: Biological replicate of *in vivo* experiment.

A)

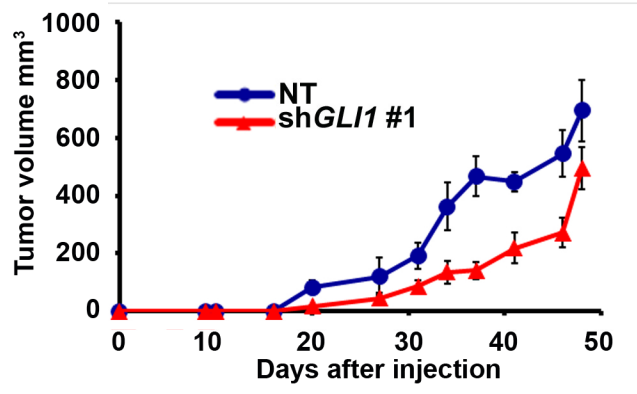

**Figure S5: Screen for upstream *GLI1* effectors.**

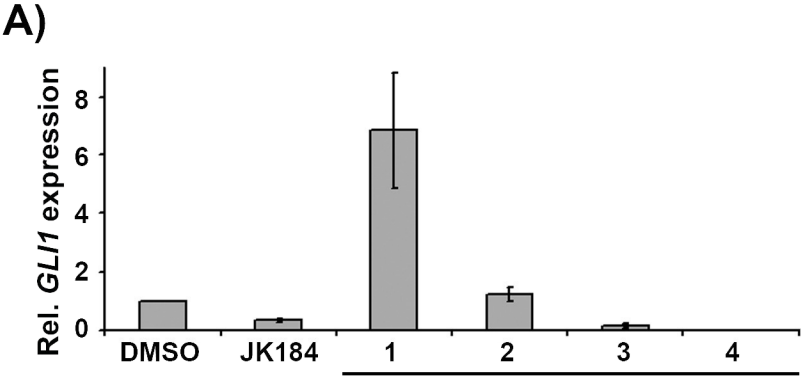

| Group 1   | Group 2   | Group 3    | Group 4                  |
|-----------|-----------|------------|--------------------------|
| MK2206    | Bez-235   | Bosutinib  | AR-A014413               |
| Sunitinib | Obatoclox | SB203530   | Erlotinib                |
| U0126     | Pha665752 | Triptolide | JNK Inhib. II<br>Stattic |

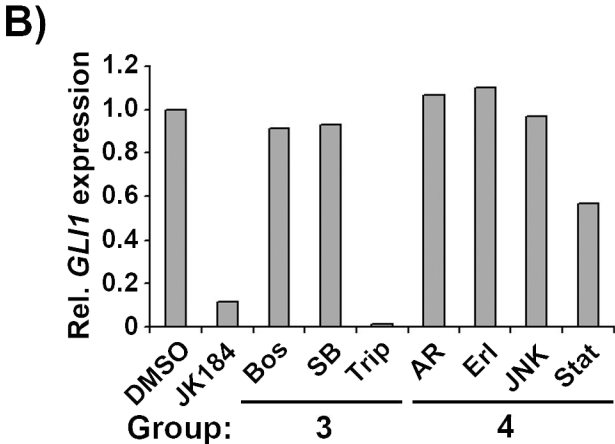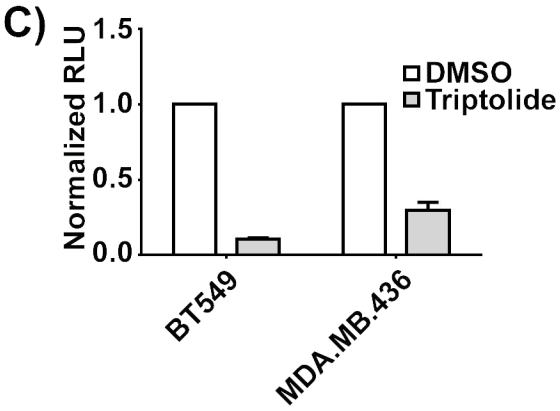

**Figure S6: NFκB immunofluorescence in claudin-low cell lines.**

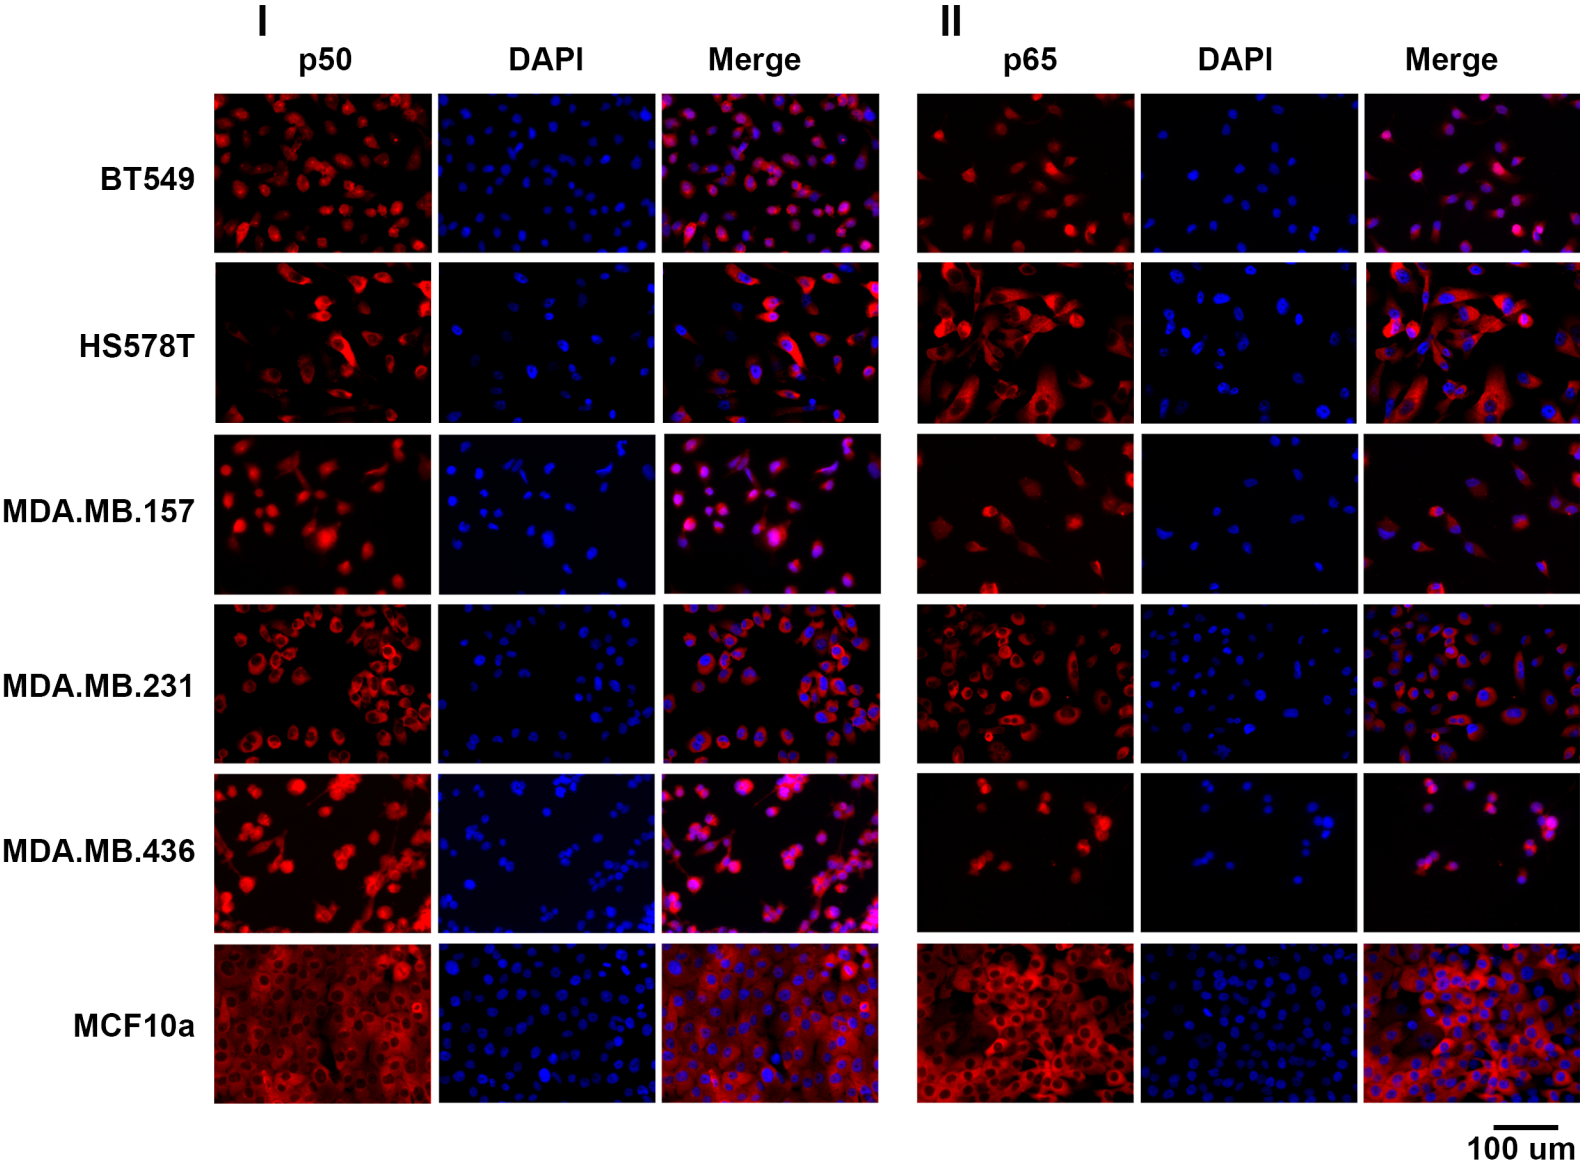

**Figure S7: p65 ChIP from additional cell lines and additional knockdown experiments**

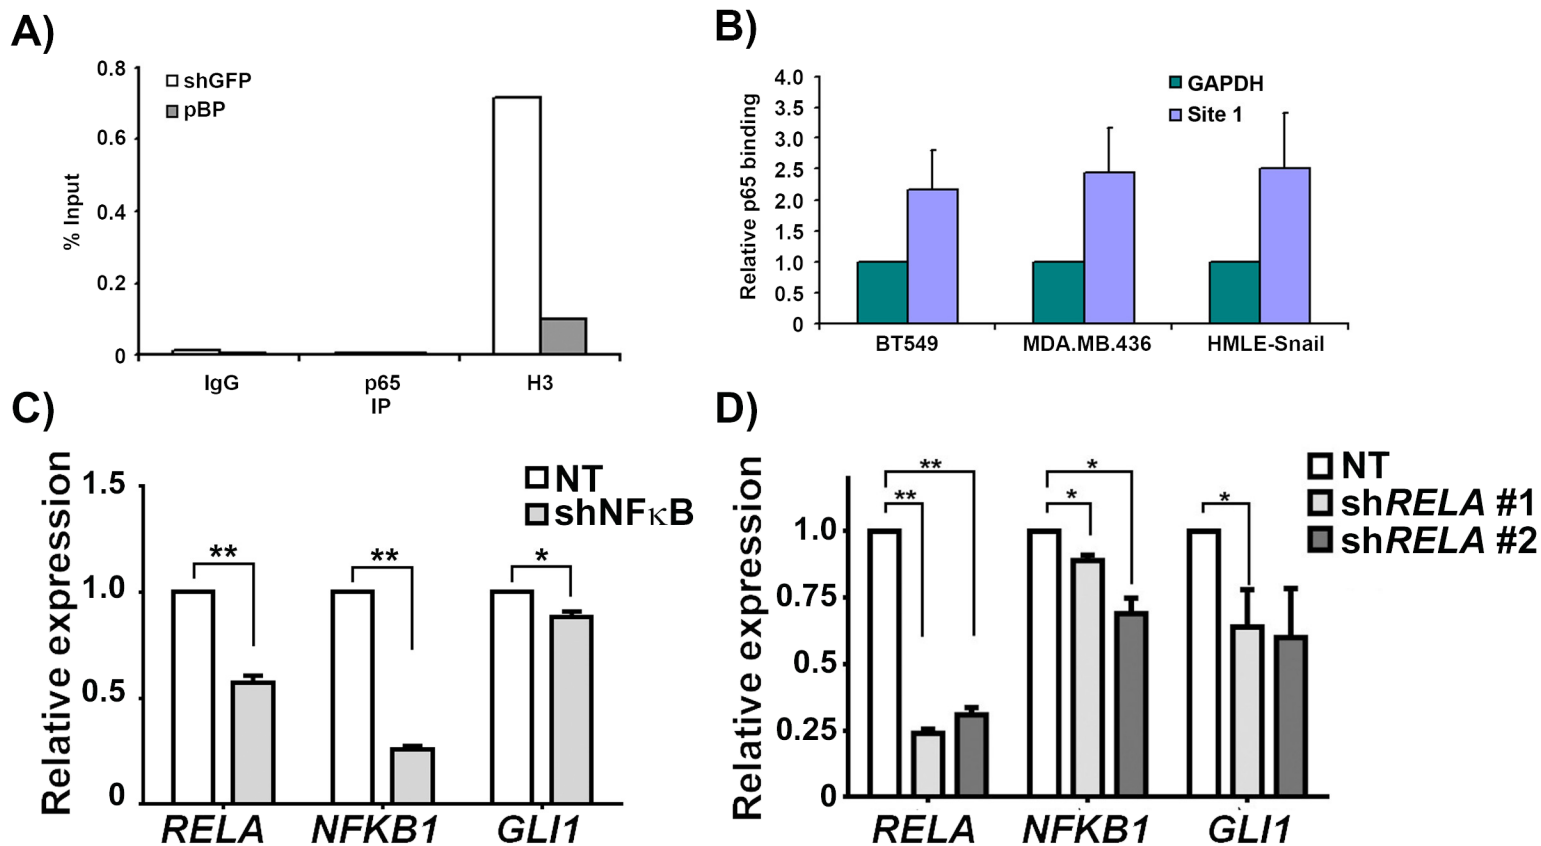

Supplement: MOESM1 [file 9781184]
